# Supplementary material
Source: Springer Nature journal article supplement (https://www.springermedizin.de/resource/supplementary/12885_2008_1105_MOESM7_ESM.pdf/9471128)

**(A) Non-cancerous tissue**

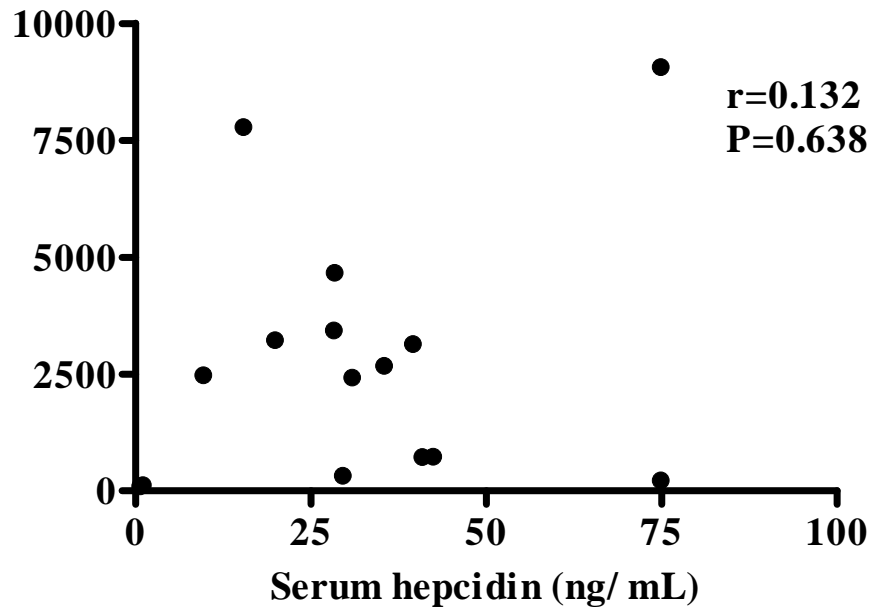

**(B) Cancerous tissue**

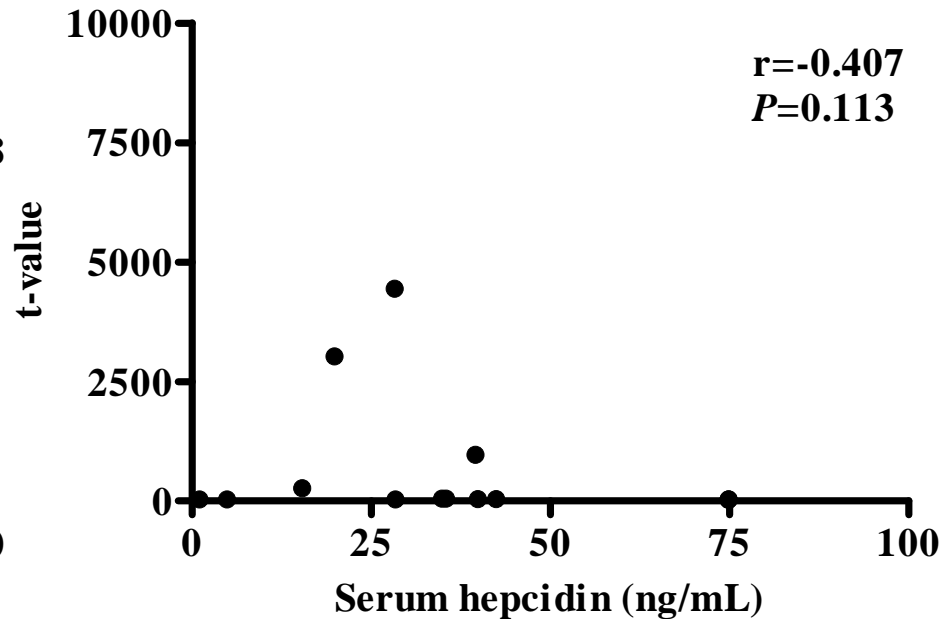

Supplement: MOESM7 [file 9471128]
